# Supplementary material for: Detailed magnetic analysis and successful deep-neural-network-based conformational prediction for [VO(dmso)5][BPh4]2
Source: Royal Society of Chemistry journal article supplement (doi:10.1039/d0ra00854k), 2020-01-01
Supplement: d0ra00854k1.pdf [file d0ra00854k1.pdf]

## Supporting information

### 1 Magnetic equations

Independent parameters are  $\kappa$ ,  $\lambda$ ,  $v$ ,  $q$ , and  $p$ .

$$\Delta = v\kappa\lambda$$

$$Q = q\kappa\lambda$$

$$P = p\kappa\lambda$$

$$g_e = 2.0023$$

$$c_{11} = \frac{d_{11}}{\sqrt{d_{11}^2 + d_{12}^2 + d_{13}^2}}$$

$$c_{12} = \frac{d_{12}}{\sqrt{d_{11}^2 + d_{12}^2 + d_{13}^2}}$$

$$c_{13} = \frac{d_{13}}{\sqrt{d_{11}^2 + d_{12}^2 + d_{13}^2}}$$

$$c_{31} = \frac{d_{31}}{\sqrt{d_{31}^2 + d_{32}^2 + d_{33}^2}}$$

$$c_{32} = \frac{d_{32}}{\sqrt{d_{31}^2 + d_{32}^2 + d_{33}^2}}$$

$$c_{33} = \frac{d_{33}}{\sqrt{d_{31}^2 + d_{32}^2 + d_{33}^2}}$$

$$c_{41} = \frac{d_{41}}{\sqrt{d_{41}^2 + d_{42}^2 + d_{43}^2}}$$

$$c_{42} = \frac{d_{42}}{\sqrt{d_{41}^2 + d_{42}^2 + d_{43}^2}}$$

$$c_{43} = \frac{d_{43}}{\sqrt{d_{41}^2 + d_{42}^2 + d_{43}^2}}$$

$$c_{24} = \frac{d_{21}}{\sqrt{d_{21}^2 + d_{22}^2}}$$

$$c_{25} = \frac{d_{22}}{\sqrt{d_{21}^2 + d_{22}^2}}$$

$$c_{54} = \frac{d_{51}}{\sqrt{d_{51}^2 + d_{52}^2}}$$

$$c_{55} = \frac{d_{52}}{\sqrt{d_{51}^2 + d_{52}^2}}$$

$$d_{11} = \frac{3q}{6+3q-4v-ec1}$$

$$d_{12} = -1$$

$$d_{13} = \frac{6}{3+2v-ec1}$$

$$d_{31} = \frac{3q}{6+3q-4v-ec3}$$

$$d_{32} = -1$$

$$d_{33} = \frac{6}{3+2v-ec3}$$

$$d_{41} = \frac{3q}{6+3q-4v-ec4}$$

$$d_{42} = -1$$

$$d_{43} = \frac{6}{3+2v-ec4}$$

$$d_{21} = \frac{3\sqrt{6}}{-3+2v-ec2}$$

$$d_{22} = -1$$

$$d_{51} = \frac{3\sqrt{6}}{-3+2v-ec5}$$

$$d_{52} = -1$$

$$A = -36v^2 + 36qv - 36v - 36q^2 + 18q - 225$$

$$B = -432v^3 + 648qv^2 - 648v^2 + 648q^2v + 648qv + 1620v - 432q^3 + 324q^2 - 810q + 6750$$

$$ec1 = -2v + 2q + 1 - \frac{\sqrt[3]{B+\sqrt{4A^3+B^2}}}{3\sqrt[3]{2}} + \frac{\sqrt[3]{2}A}{3\sqrt[3]{B+\sqrt{4A^3+B^2}}}$$

$$ec2 = \frac{1}{2} \left( -2v + 6p - 3 - 3\sqrt{4v^2 - 8pv - 4v + 4p^2 + 4p + 25} \right)$$

$$ec3 = -2v + 2q + 1 + \frac{(1+i\sqrt{3})\sqrt[3]{B+\sqrt{4A^3+B^2}}}{6\sqrt[3]{2}} - \frac{(1-i\sqrt{3})A}{3\sqrt[3]{2}\sqrt[3]{B+\sqrt{4A^3+B^2}}}$$

$$ec4 = -2v + 2q + 1 + \frac{(1-i\sqrt{3})\sqrt[3]{B+\sqrt{4A^3+B^2}}}{6\sqrt[3]{2}} - \frac{(1+i\sqrt{3})A}{3\sqrt[3]{2}\sqrt[3]{B+\sqrt{4A^3+B^2}}}$$

$$ec5 = \frac{1}{2} \left( -2v + 6p - 3 + 3\sqrt{4v^2 - 8pv - 4v + 4p^2 + 4p + 25} \right)$$

$$\begin{aligned}
E_{\pm 1}^{(0)} &= c_{11}^2 \left( \frac{-2\Delta}{3} + \kappa\lambda + \frac{Q}{2} \right) + 2c_{11}c_{12} \left( \frac{Q}{2} \right) + c_{12}^2 \left( \frac{-2\Delta}{3} - \kappa\lambda + \frac{Q}{2} \right) + 2c_{12}c_{13}(\kappa\lambda) + c_{13}^2 \left( \frac{\Delta}{3} + \frac{\kappa\lambda}{2} \right) \\
E_{\pm 2}^{(0)} &= c_{24}^2 \left( \frac{\Delta}{3} - \frac{\kappa\lambda}{2} \right) + 2c_{24}c_{25} \left( \frac{\sqrt{6}\kappa\lambda}{2} \right) + c_{25}^2 \left( \frac{-2\Delta}{3} + P \right) \\
E_{\pm 3}^{(0)} &= c_{31}^2 \left( \frac{-2\Delta}{3} + \kappa\lambda + \frac{Q}{2} \right) + 2c_{31}c_{32} \left( \frac{Q}{2} \right) + c_{32}^2 \left( \frac{-2\Delta}{3} - \kappa\lambda + \frac{Q}{2} \right) + 2c_{32}c_{33}(\kappa\lambda) + c_{33}^2 \left( \frac{\Delta}{3} + \frac{\kappa\lambda}{2} \right) \\
E_{\pm 4}^{(0)} &= c_{41}^2 \left( \frac{-2\Delta}{3} + \kappa\lambda + \frac{Q}{2} \right) + 2c_{41}c_{42} \left( \frac{Q}{2} \right) + c_{42}^2 \left( \frac{-2\Delta}{3} - \kappa\lambda + \frac{Q}{2} \right) + 2c_{42}c_{43}(\kappa\lambda) + c_{43}^2 \left( \frac{\Delta}{3} + \frac{\kappa\lambda}{2} \right) \\
E_{\pm 5}^{(0)} &= c_{54}^2 \left( \frac{\Delta}{3} - \frac{\kappa\lambda}{2} \right) + 2c_{54}c_{55} \left( \frac{\sqrt{6}\kappa\lambda}{2} \right) + c_{55}^2 \left( \frac{-2\Delta}{3} + P \right) \\
E_{1,z}^{(1)} &= -E_{-1,z}^{(1)} = (c_{11}^2(2\kappa + g_e/2) + c_{12}^2(-2\kappa + g_e/2) + c_{13}^2(-\kappa - g_e/2)) \beta \\
E_{2,z}^{(1)} &= -E_{-2,z}^{(1)} = (c_{24}^2(\kappa - g_e/2) + c_{25}^2(g_e/2)) \beta \\
E_{3,z}^{(1)} &= -E_{-3,z}^{(1)} = (c_{31}^2(2\kappa + g_e/2) + c_{32}^2(-2\kappa + g_e/2) + c_{33}^2(-\kappa - g_e/2)) \beta \\
E_{4,z}^{(1)} &= -E_{-4,z}^{(1)} = (c_{41}^2(2\kappa + g_e/2) + c_{42}^2(-2\kappa + g_e/2) + c_{43}^2(-\kappa - g_e/2)) \beta \\
E_{5,z}^{(1)} &= -E_{-5,z}^{(1)} = (c_{54}^2(\kappa - g_e/2) + c_{55}^2(g_e/2)) \beta \\
E_{\pm 1,z}^{(2)} &= \left( \frac{(c_{11}c_{31}(2\kappa + g_e/2) + c_{12}c_{32}(-2\kappa + g_e/2) + c_{13}c_{33}(-\kappa - g_e/2))^2}{E_1^{(0)} - E_3^{(0)}} + \frac{(c_{11}c_{41}(2\kappa + g_e/2) + c_{12}c_{42}(-2\kappa + g_e/2) + c_{13}c_{43}(-\kappa - g_e/2))^2}{E_1^{(0)} - E_4^{(0)}} \right) \beta^2 \\
E_{\pm 2,z}^{(2)} &= \left( \frac{(c_{24}c_{54}(\kappa - g_e/2) + c_{25}c_{55}(g_e/2))^2}{E_2^{(0)} - E_5^{(0)}} \right) \beta^2 \\
E_{\pm 3,z}^{(2)} &= \left( \frac{(c_{11}c_{31}(2\kappa + g_e/2) + c_{12}c_{32}(-2\kappa + g_e/2) + c_{13}c_{33}(-\kappa - g_e/2))^2}{E_3^{(0)} - E_1^{(0)}} + \frac{(c_{31}c_{41}(2\kappa + g_e/2) + c_{32}c_{42}(-2\kappa + g_e/2) + c_{33}c_{43}(-\kappa - g_e/2))^2}{E_3^{(0)} - E_4^{(0)}} \right) \beta^2 \\
E_{\pm 4,z}^{(2)} &= \left( \frac{(c_{41}c_{31}(2\kappa + g_e/2) + c_{42}c_{32}(-2\kappa + g_e/2) + c_{43}c_{33}(-\kappa - g_e/2))^2}{E_4^{(0)} - E_3^{(0)}} + \frac{(c_{11}c_{41}(2\kappa + g_e/2) + c_{12}c_{42}(-2\kappa + g_e/2) + c_{13}c_{43}(-\kappa - g_e/2))^2}{E_4^{(0)} - E_1^{(0)}} \right) \beta^2 \\
E_{\pm 5,z}^{(2)} &= \left( \frac{(c_{24}c_{54}(\kappa - g_e/2) + c_{25}c_{55}(g_e/2))^2}{E_5^{(0)} - E_2^{(0)}} \right) \beta^2 \\
E_{1,x}^{(1)} &= -E_{-1,x}^{(1)} = (2c_{11}c_{12}(g_e/2) + 2c_{11}c_{13}(\kappa)) \beta \\
E_{2,x}^{(1)} &= -E_{-2,x}^{(1)} = \left( 2c_{24}c_{25} \left( \frac{\sqrt{6}}{2} \kappa \right) + c_{25}c_{25}(g_e/2) \right) \beta \\
E_{3,x}^{(1)} &= -E_{-3,x}^{(1)} = (2c_{31}c_{32}(g_e/2) + 2c_{31}c_{33}(\kappa)) \beta \\
E_{4,x}^{(1)} &= -E_{-4,x}^{(1)} = (2c_{41}c_{42}(g_e/2) + 2c_{41}c_{43}(\kappa)) \beta \\
E_{5,x}^{(1)} &= -E_{-5,x}^{(1)} = \left( 2c_{54}c_{55} \left( \frac{\sqrt{6}}{2} \kappa \right) + c_{55}c_{55}(g_e/2) \right) \beta \\
E_{\pm 1,x}^{(2)} &= \left( \frac{(c_{12}c_{24}\kappa + c_{13}c_{24}(g_e/2) + c_{13}c_{25} \left( \frac{\sqrt{6}}{2} \kappa \right))^2}{E_1^{(0)} - E_2^{(0)}} + \frac{((c_{11}c_{32} + c_{12}c_{31})(g_e/2) + (c_{11}c_{33} + c_{13}c_{31})\kappa)^2}{E_1^{(0)} - E_3^{(0)}} + \right. \\
&\quad \left. \frac{((c_{11}c_{42} + c_{12}c_{41})(g_e/2) + (c_{11}c_{43} + c_{13}c_{41})\kappa)^2}{E_1^{(0)} - E_4^{(0)}} + \frac{(c_{12}c_{54}\kappa + c_{13}c_{54}(g_e/2) + c_{13}c_{55} \left( \frac{\sqrt{6}}{2} \kappa \right))^2}{E_1^{(0)} - E_5^{(0)}} \right) \beta^2 \\
E_{\pm 2,x}^{(2)} &= \left( \frac{(c_{12}c_{24}\kappa + c_{13}c_{24}(g_e/2) + c_{13}c_{25} \left( \frac{\sqrt{6}}{2} \kappa \right))^2}{E_2^{(0)} - E_1^{(0)}} + \frac{(c_{32}c_{24}\kappa + c_{33}c_{24}(g_e/2) + c_{33}c_{25} \left( \frac{\sqrt{6}}{2} \kappa \right))^2}{E_2^{(0)} - E_3^{(0)}} + \right. \\
&\quad \left. \frac{(c_{42}c_{24}\kappa + c_{43}c_{24}(g_e/2) + c_{43}c_{25} \left( \frac{\sqrt{6}}{2} \kappa \right))^2}{E_2^{(0)} - E_4^{(0)}} + \frac{(c_{25}c_{55}(g_e/2) + (c_{24}c_{55} + c_{25}c_{54}) \left( \frac{\sqrt{6}}{2} \kappa \right))^2}{E_2^{(0)} - E_5^{(0)}} \right) \beta^2 \\
E_{\pm 3,x}^{(2)} &= \left( \frac{(c_{32}c_{24}\kappa + c_{33}c_{24}(g_e/2) + c_{33}c_{25} \left( \frac{\sqrt{6}}{2} \kappa \right))^2}{E_3^{(0)} - E_2^{(0)}} + \frac{((c_{11}c_{32} + c_{12}c_{31})(g_e/2) + (c_{11}c_{33} + c_{13}c_{31})\kappa)^2}{E_3^{(0)} - E_1^{(0)}} + \right. \\
&\quad \left. \frac{((c_{31}c_{42} + c_{32}c_{41})(g_e/2) + (c_{31}c_{43} + c_{33}c_{41})\kappa)^2}{E_3^{(0)} - E_4^{(0)}} + \frac{(c_{32}c_{54}\kappa + c_{33}c_{54}(g_e/2) + c_{33}c_{55} \left( \frac{\sqrt{6}}{2} \kappa \right))^2}{E_3^{(0)} - E_5^{(0)}} \right) \beta^2 \\
E_{\pm 4,x}^{(2)} &= \left( \frac{(c_{42}c_{24}\kappa + c_{43}c_{24}(g_e/2) + c_{43}c_{25} \left( \frac{\sqrt{6}}{2} \kappa \right))^2}{E_4^{(0)} - E_2^{(0)}} + \frac{((c_{41}c_{32} + c_{42}c_{31})(g_e/2) + (c_{41}c_{33} + c_{43}c_{31})\kappa)^2}{E_4^{(0)} - E_3^{(0)}} + \right. \\
&\quad \left. \frac{((c_{11}c_{42} + c_{12}c_{41})(g_e/2) + (c_{11}c_{43} + c_{13}c_{41})\kappa)^2}{E_4^{(0)} - E_1^{(0)}} + \frac{(c_{42}c_{54}\kappa + c_{43}c_{54}(g_e/2) + c_{43}c_{55} \left( \frac{\sqrt{6}}{2} \kappa \right))^2}{E_4^{(0)} - E_5^{(0)}} \right) \beta^2 \\
E_{\pm 5,x}^{(2)} &= \left( \frac{(c_{12}c_{54}\kappa + c_{13}c_{54}(g_e/2) + c_{13}c_{55} \left( \frac{\sqrt{6}}{2} \kappa \right))^2}{E_5^{(0)} - E_1^{(0)}} + \frac{(c_{32}c_{54}\kappa + c_{33}c_{54}(g_e/2) + c_{33}c_{55} \left( \frac{\sqrt{6}}{2} \kappa \right))^2}{E_5^{(0)} - E_3^{(0)}} + \right.
\end{aligned}$$

$$\left( \frac{(c_{42}c_{54}\kappa + c_{43}c_{54}(g_e/2) + c_{43}c_{55}(\frac{\sqrt{6}}{2}\kappa))^2}{E_5^{(0)} - E_4^{(0)}} + \frac{(c_{25}c_{55}(g_e/2) + (c_{24}c_{55} + c_{25}c_{54})(\frac{\sqrt{6}}{2}\kappa))^2}{E_5^{(0)} - E_2^{(0)}} \right) \beta^2$$

$$\chi_A = \frac{\chi_z + 2\chi_x}{3}$$

$$\chi_z(x) = \frac{N \sum_n (-E_{n,z(x)}^{(1)} - 2E_{n,z(x)}^{(2)} H_{z(x)}) \exp\left[\frac{-E_{n,z(x)}}{kT}\right]}{H_{z(x)} \sum_n \exp\left[\frac{-E_{n,z(x)}}{kT}\right]}$$

$$M_{av} = \sum_{j=1}^m M\left(\frac{(j-\frac{45}{m})\pi}{180}\right) \left[\cos\frac{(j-1)\pi}{180} - \cos\frac{j\pi}{180}\right]$$

$$M(\theta) = \frac{N \sum_n (-E_{n,\theta}^{(1)} - 2E_{n,\theta}^{(2)} H_\theta) \exp\left[\frac{-E_{n,\theta}}{kT}\right]}{\sum_n \exp\left[\frac{-E_{n,\theta}}{kT}\right]}$$

## 2 Conformer codes

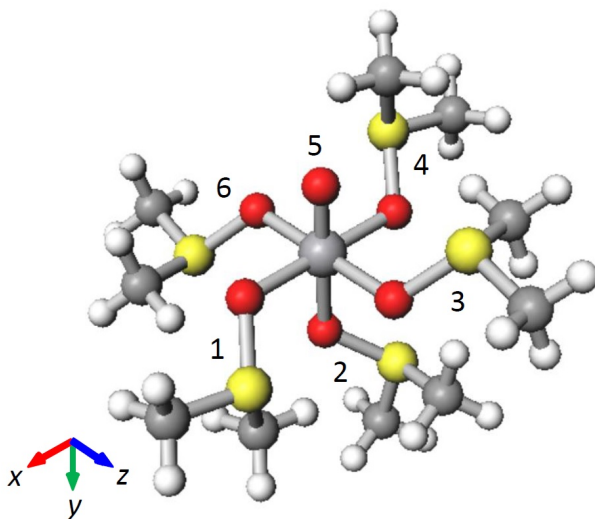

**Fig. S1.** An example of a conformer with a numbering system.  
The numbering order is  $x, y, z, -x, -y, -z$ .

Conformer codes are based on the reference [H. Sakiyama and K. Waki, *J. Math. Chem.*, 2017, **55**, 1360].

**Table S1.** Conformers of [MX(ABC)<sub>5</sub>] complexes with L5-B35 core

| Code        | Dihedral angles (°) of M-A-B-C units |
|-------------|--------------------------------------|
| L5-B35-1    | [180,180,180,180,-,180]              |
| L5-B35-2    | [300,180,180,180,-,180]              |
| L5-B35-3    | [60,180,180,180,-,180]               |
| L5-B35-4    | [180,300,180,180,-,180]              |
| L5-B35-5    | [300,300,180,180,-,180]              |
| L5-B35-6    | [60,300,180,180,-,180]               |
| L5-B35-7    | [180,60,180,180,-,180]               |
| L5-B35-8    | [300,60,180,180,-,180]               |
| L5-B35-9    | [60,60,180,180,-,180]                |
| L5-B35-10   | [180,180,300,180,-,180]              |
| L5-B35-11   | [300,180,300,180,-,180]              |
| L5-B35-12   | [60,180,300,180,-,180]               |
| L5-B35-13   | [180,300,300,180,-,180]              |
| L5-B35-14   | [300,300,300,180,-,180]              |
| L5-B35-15   | [60,300,300,180,-,180]               |
| L5-B35-16   | [180,60,300,180,-,180]               |
| L5-B35-17   | [300,60,300,180,-,180]               |
| L5-B35-18   | [60,60,300,180,-,180]                |
| L5-B35-19   | [180,180,60,180,-,180]               |
| L5-B35-20   | [300,180,60,180,-,180]               |
| L5-B35-21   | [60,180,60,180,-,180]                |
| L5-B35-22   | [180,300,60,180,-,180]               |
| L5-B35-23   | [300,300,60,180,-,180]               |
| L5-B35-24   | [60,300,60,180,-,180]                |
| L5-B35-25   | [180,60,60,180,-,180]                |
| L5-B35-26   | [300,60,60,180,-,180]                |
| 1 L5-B35-27 | [60,60,60,180,-,180]                 |
| L5-B35-28   | [180,180,180,300,-,180]              |
| L5-B35-29   | [300,180,180,300,-,180]              |
| L5-B35-30   | [60,180,180,300,-,180]               |
| L5-B35-31   | [180,300,180,300,-,180]              |
| L5-B35-32   | [300,300,180,300,-,180]              |
| L5-B35-33   | [60,300,180,300,-,180]               |
| L5-B35-34   | [180,60,180,300,-,180]               |
| L5-B35-35   | [300,60,180,300,-,180]               |
| L5-B35-36   | [60,60,180,300,-,180]                |
| L5-B35-37   | [180,180,300,300,-,180]              |
| L5-B35-38   | [300,180,300,300,-,180]              |
| L5-B35-39   | [60,180,300,300,-,180]               |
| L5-B35-40   | [180,300,300,300,-,180]              |
| L5-B35-41   | [300,300,300,300,-,180]              |
| L5-B35-42   | [60,300,300,300,-,180]               |
| L5-B35-43   | [180,60,300,300,-,180]               |
| L5-B35-44   | [300,60,300,300,-,180]               |
| L5-B35-45   | [60,60,300,300,-,180]                |
| L5-B35-46   | [180,180,60,300,-,180]               |
| L5-B35-47   | [300,180,60,300,-,180]               |
| L5-B35-48   | [60,180,60,300,-,180]                |
| L5-B35-49   | [180,300,60,300,-,180]               |
| L5-B35-50   | [300,300,60,300,-,180]               |
| L5-B35-51   | [60,300,60,300,-,180]                |
| L5-B35-52   | [180,60,60,300,-,180]                |
| L5-B35-53   | [300,60,60,300,-,180]                |
| L5-B35-54   | [60,60,60,300,-,180]                 |
| L5-B35-55   | [180,180,180,60,-,180]               |

| Code       | Dihedral angles (°) of M-A-B-C units |
|------------|--------------------------------------|
| L5-B35-56  | [300,180,180,60,-,180]               |
| L5-B35-57  | [60,180,180,60,-,180]                |
| L5-B35-58  | [180,300,180,60,-,180]               |
| L5-B35-59  | [300,300,180,60,-,180]               |
| L5-B35-60  | [60,300,180,60,-,180]                |
| L5-B35-61  | [180,60,180,60,-,180]                |
| L5-B35-62  | [300,60,180,60,-,180]                |
| L5-B35-63  | [60,60,180,60,-,180]                 |
| L5-B35-64  | [180,180,300,60,-,180]               |
| L5-B35-65  | [300,180,300,60,-,180]               |
| L5-B35-66  | [60,180,300,60,-,180]                |
| L5-B35-67  | [180,300,300,60,-,180]               |
| L5-B35-68  | [300,300,300,60,-,180]               |
| L5-B35-69  | [60,300,300,60,-,180]                |
| L5-B35-70  | [180,60,300,60,-,180]                |
| L5-B35-71  | [300,60,300,60,-,180]                |
| L5-B35-72  | [60,60,300,60,-,180]                 |
| L5-B35-73  | [180,180,60,60,-,180]                |
| L5-B35-74  | [300,180,60,60,-,180]                |
| L5-B35-75  | [60,180,60,60,-,180]                 |
| L5-B35-76  | [180,300,60,60,-,180]                |
| L5-B35-77  | [300,300,60,60,-,180]                |
| L5-B35-78  | [60,300,60,60,-,180]                 |
| L5-B35-79  | [180,60,60,60,-,180]                 |
| L5-B35-80  | [300,60,60,60,-,180]                 |
| L5-B35-81  | [60,60,60,60,-,180]                  |
| L5-B35-82  | [180,180,180,180,-,300]              |
| L5-B35-83  | [300,180,180,180,-,300]              |
| L5-B35-84  | [60,180,180,180,-,300]               |
| L5-B35-85  | [180,300,180,180,-,300]              |
| L5-B35-86  | [300,300,180,180,-,300]              |
| L5-B35-87  | [60,300,180,180,-,300]               |
| L5-B35-88  | [180,60,180,180,-,300]               |
| L5-B35-89  | [300,60,180,180,-,300]               |
| L5-B35-90  | [60,60,180,180,-,300]                |
| L5-B35-91  | [180,180,300,180,-,300]              |
| L5-B35-92  | [300,180,300,180,-,300]              |
| L5-B35-93  | [60,180,300,180,-,300]               |
| L5-B35-94  | [180,300,300,180,-,300]              |
| L5-B35-95  | [300,300,300,180,-,300]              |
| L5-B35-96  | [60,300,300,180,-,300]               |
| L5-B35-97  | [180,60,300,180,-,300]               |
| L5-B35-98  | [300,60,300,180,-,300]               |
| L5-B35-99  | [60,60,300,180,-,300]                |
| L5-B35-100 | [180,180,60,180,-,300]               |
| L5-B35-101 | [300,180,60,180,-,300]               |
| L5-B35-102 | [60,180,60,180,-,300]                |
| L5-B35-103 | [180,300,60,180,-,300]               |
| L5-B35-104 | [300,300,60,180,-,300]               |
| L5-B35-105 | [60,300,60,180,-,300]                |
| L5-B35-106 | [180,60,60,180,-,300]                |
| L5-B35-107 | [300,60,60,180,-,300]                |
| L5-B35-108 | [60,60,60,180,-,300]                 |
| L5-B35-109 | [180,180,180,300,-,300]              |
| L5-B35-110 | [300,180,180,300,-,300]              |
| L5-B35-111 | [60,180,180,300,-,300]               |
| L5-B35-112 | [180,300,180,300,-,300]              |

| Code       | Dihedral angles ( $^{\circ}$ ) of M-A-B-C units |
|------------|-------------------------------------------------|
| L5-B35-113 | [300,300,180,300,-,300]                         |
| L5-B35-114 | [60,300,180,300,-,300]                          |
| L5-B35-115 | [180,60,180,300,-,300]                          |
| L5-B35-116 | [300,60,180,300,-,300]                          |
| L5-B35-117 | [60,60,180,300,-,300]                           |
| L5-B35-118 | [180,180,300,300,-,300]                         |
| L5-B35-119 | [300,180,300,300,-,300]                         |
| L5-B35-120 | [60,180,300,300,-,300]                          |
| L5-B35-121 | [180,300,300,300,-,300]                         |
| L5-B35-122 | [300,300,300,300,-,300]                         |
| L5-B35-123 | [60,300,300,300,-,300]                          |
| L5-B35-124 | [180,60,300,300,-,300]                          |
| L5-B35-125 | [300,60,300,300,-,300]                          |
| L5-B35-126 | [60,60,300,300,-,300]                           |
| L5-B35-127 | [180,180,60,300,-,300]                          |
| L5-B35-128 | [300,180,60,300,-,300]                          |
| L5-B35-129 | [60,180,60,300,-,300]                           |
| L5-B35-130 | [180,300,60,300,-,300]                          |
| L5-B35-131 | [300,300,60,300,-,300]                          |
| L5-B35-132 | [60,300,60,300,-,300]                           |
| L5-B35-133 | [180,60,60,300,-,300]                           |
| L5-B35-134 | [300,60,60,300,-,300]                           |
| L5-B35-135 | [60,60,60,300,-,300]                            |
| L5-B35-136 | [180,180,180,60,-,300]                          |
| L5-B35-137 | [300,180,180,60,-,300]                          |
| L5-B35-138 | [60,180,180,60,-,300]                           |
| L5-B35-139 | [180,300,180,60,-,300]                          |
| L5-B35-140 | [300,300,180,60,-,300]                          |
| L5-B35-141 | [60,300,180,60,-,300]                           |
| L5-B35-142 | [180,60,180,60,-,300]                           |
| L5-B35-143 | [300,60,180,60,-,300]                           |
| L5-B35-144 | [60,60,180,60,-,300]                            |
| L5-B35-145 | [180,180,300,60,-,300]                          |
| L5-B35-146 | [300,180,300,60,-,300]                          |
| L5-B35-147 | [60,180,300,60,-,300]                           |
| L5-B35-148 | [180,300,300,60,-,300]                          |
| L5-B35-149 | [300,300,300,60,-,300]                          |
| L5-B35-150 | [60,300,300,60,-,300]                           |
| L5-B35-151 | [180,60,300,60,-,300]                           |
| L5-B35-152 | [300,60,300,60,-,300]                           |
| L5-B35-153 | [60,60,300,60,-,300]                            |
| L5-B35-154 | [180,180,60,60,-,300]                           |
| L5-B35-155 | [300,180,60,60,-,300]                           |
| L5-B35-156 | [60,180,60,60,-,300]                            |
| L5-B35-157 | [180,300,60,60,-,300]                           |
| L5-B35-158 | [300,300,60,60,-,300]                           |
| L5-B35-159 | [60,300,60,60,-,300]                            |
| L5-B35-160 | [180,60,60,60,-,300]                            |
| L5-B35-161 | [300,60,60,60,-,300]                            |
| L5-B35-162 | [60,60,60,60,-,300]                             |
| L5-B35-163 | [180,180,180,180,-,60]                          |
| L5-B35-164 | [300,180,180,180,-,60]                          |
| L5-B35-165 | [60,180,180,180,-,60]                           |
| L5-B35-166 | [180,300,180,180,-,60]                          |
| L5-B35-167 | [300,300,180,180,-,60]                          |
| L5-B35-168 | [60,300,180,180,-,60]                           |
| L5-B35-169 | [180,60,180,180,-,60]                           |
| L5-B35-170 | [300,60,180,180,-,60]                           |

| Code       | Dihedral angles ( $^{\circ}$ ) of M-A-B-C units |
|------------|-------------------------------------------------|
| L5-B35-171 | [60,60,180,180,-,60]                            |
| L5-B35-172 | [180,180,300,180,-,60]                          |
| L5-B35-173 | [300,180,300,180,-,60]                          |
| L5-B35-174 | [60,180,300,180,-,60]                           |
| L5-B35-175 | [180,300,300,180,-,60]                          |
| L5-B35-176 | [300,300,300,180,-,60]                          |
| L5-B35-177 | [60,300,300,180,-,60]                           |
| L5-B35-178 | [180,60,300,180,-,60]                           |
| L5-B35-179 | [300,60,300,180,-,60]                           |
| L5-B35-180 | [60,60,300,180,-,60]                            |
| L5-B35-181 | [180,180,60,180,-,60]                           |
| L5-B35-182 | [300,180,60,180,-,60]                           |
| L5-B35-183 | [60,180,60,180,-,60]                            |
| L5-B35-184 | [180,300,60,180,-,60]                           |
| L5-B35-185 | [300,300,60,180,-,60]                           |
| L5-B35-186 | [60,300,60,180,-,60]                            |
| L5-B35-187 | [180,60,60,180,-,60]                            |
| L5-B35-188 | [300,60,60,180,-,60]                            |
| L5-B35-189 | [60,60,60,180,-,60]                             |
| L5-B35-190 | [180,180,180,300,-,60]                          |
| L5-B35-191 | [300,180,180,300,-,60]                          |
| L5-B35-192 | [60,180,180,300,-,60]                           |
| L5-B35-193 | [180,300,180,300,-,60]                          |
| L5-B35-194 | [300,300,180,300,-,60]                          |
| L5-B35-195 | [60,300,180,300,-,60]                           |
| L5-B35-196 | [180,60,180,300,-,60]                           |
| L5-B35-197 | [300,60,180,300,-,60]                           |
| L5-B35-198 | [60,60,180,300,-,60]                            |
| L5-B35-199 | [180,180,300,300,-,60]                          |
| L5-B35-200 | [300,180,300,300,-,60]                          |
| L5-B35-201 | [60,180,300,300,-,60]                           |
| L5-B35-202 | [180,300,300,300,-,60]                          |
| L5-B35-203 | [300,300,300,300,-,60]                          |
| L5-B35-204 | [60,300,300,300,-,60]                           |
| L5-B35-205 | [180,60,300,300,-,60]                           |
| L5-B35-206 | [300,60,300,300,-,60]                           |
| L5-B35-207 | [60,60,300,300,-,60]                            |
| L5-B35-208 | [180,180,60,300,-,60]                           |
| L5-B35-209 | [300,180,60,300,-,60]                           |
| L5-B35-210 | [60,180,60,300,-,60]                            |
| L5-B35-211 | [180,300,60,300,-,60]                           |
| L5-B35-212 | [300,300,60,300,-,60]                           |
| L5-B35-213 | [60,300,60,300,-,60]                            |
| L5-B35-214 | [180,60,60,300,-,60]                            |
| L5-B35-215 | [300,60,60,300,-,60]                            |
| L5-B35-216 | [60,60,60,300,-,60]                             |
| L5-B35-217 | [180,180,180,60,-,60]                           |
| L5-B35-218 | [300,180,180,60,-,60]                           |
| L5-B35-219 | [60,180,180,60,-,60]                            |
| L5-B35-220 | [180,300,180,60,-,60]                           |
| L5-B35-221 | [300,300,180,60,-,60]                           |
| L5-B35-222 | [60,300,180,60,-,60]                            |
| L5-B35-223 | [180,60,180,60,-,60]                            |
| L5-B35-224 | [300,60,180,60,-,60]                            |
| L5-B35-225 | [60,60,180,60,-,60]                             |
| L5-B35-226 | [180,180,300,60,-,60]                           |
| L5-B35-227 | [300,180,300,60,-,60]                           |
| L5-B35-228 | [60,180,300,60,-,60]                            |

| Code       | Dihedral angles ( $^{\circ}$ ) of M-A-B-C units |
|------------|-------------------------------------------------|
| L5-B35-229 | [180,300,300,60,-,60]                           |
| L5-B35-230 | [300,300,300,60,-,60]                           |
| L5-B35-231 | [60,300,300,60,-,60]                            |
| L5-B35-232 | [180,60,300,60,-,60]                            |
| L5-B35-233 | [300,60,300,60,-,60]                            |
| L5-B35-234 | [60,60,300,60,-,60]                             |
| L5-B35-235 | [180,180,60,60,-,60]                            |
| L5-B35-236 | [300,180,60,60,-,60]                            |
| L5-B35-237 | [60,180,60,60,-,60]                             |
| L5-B35-238 | [180,300,60,60,-,60]                            |
| L5-B35-239 | [300,300,60,60,-,60]                            |
| L5-B35-240 | [60,300,60,60,-,60]                             |
| L5-B35-241 | [180,60,60,60,-,60]                             |
| L5-B35-242 | [300,60,60,60,-,60]                             |
| L5-B35-243 | [60,60,60,60,-,60]                              |
